# Supplementary material for: Can Winged Aphid Abundance Be a Predictor of Cucurbit Aphid-Borne Yellows Virus Epidemics in Melon Crop?
Source: MDPI journal article supplement (doi:10.3390/v12090911), 2020-08-20
Supplement: s1 [file s1]

**Table S2.** Significant correlations (with a maximal type-1 error of 1%) between virus variables and aphid variables computed on periods relative to the date of epidemic peak ( $\mu$ ). Significant correlations involve abundances of *Aphis gossypii* (RIS-181) aggregated between  $t_1 = \mu - \Delta t_1$  and  $t_2 = \mu - \Delta t_1 + \Delta t_2$  (in days from planting date). The relationship between the virus variable and the aphid variable was modelled with a linear model ( $z_k = A_0 + A_1 \cdot x_k$ ) for the area under the disease progress curve (AUDPC<sub>56</sub>) and an exponential model ( $z_k = B_0 + B_1(1 - e^{-B_2 \cdot x_k})$ ) for the parameter  $\gamma$  of the logistic equation. No aphid variable was found significantly correlated to  $\mu$ .

| Virus variable<br>(dependent) | Aphid variable<br>(explanatory) | $\Delta t_1$ | $\Delta t_2$ | Spearman<br>correlation<br>coefficient | $A_0$ | $A_1$ | $B_0$ | $B_1$ | $B_2$ | Mean<br>square<br>error |
|-------------------------------|---------------------------------|--------------|--------------|----------------------------------------|-------|-------|-------|-------|-------|-------------------------|
| AUDPC <sub>56</sub>           | RIS-181                         | 11           | 3            | 0.764                                  | 725.9 | 54.1  | na    | na    | na    | 369776                  |
| $\gamma$                      | RIS-181                         | 12           | 5            | 0.774                                  | na    | na    | 0     | 1     | 0.067 | 0.027                   |
| $\gamma$                      | RIS-181                         | 8            | 11           | 0.735                                  | na    | na    | 0     | 1     | 0.038 | 0.029                   |
| $\gamma$                      | RIS-181                         | 8            | 12           | 0.735                                  | na    | na    | 0     | 1     | 0.037 | 0.029                   |
| $\gamma$                      | RIS-181                         | 11           | 3            | 0.772                                  | na    | na    | 0     | 1     | 0.091 | 0.032                   |
| $\gamma$                      | RIS-181                         | 11           | 4            | 0.777                                  | na    | na    | 0     | 1     | 0.079 | 0.032                   |
| $\gamma$                      | RIS-181                         | 0            | 2            | 0.750                                  | na    | na    | 0     | 1     | 0.162 | 0.037                   |
| $\gamma$                      | RIS-181                         | 0            | 3            | 0.781                                  | na    | na    | 0     | 1     | 0.130 | 0.041                   |
| $\gamma$                      | RIS-181                         | 4            | 6            | 0.735                                  | na    | na    | 0     | 1     | 0.063 | 0.041                   |
| $\gamma$                      | RIS-181                         | 9            | 2            | 0.758                                  | na    | na    | 0     | 1     | 0.198 | 0.069                   |
| $\gamma$                      | RIS-181                         | 8            | 0            | 0.753                                  | na    | na    | 0     | 1     | 0.501 | 0.141                   |
