# Supplementary material for: Can Winged Aphid Abundance Be a Predictor of Cucurbit Aphid-Borne Yellows Virus Epidemics in Melon Crop?
Source: MDPI journal article supplement (doi:10.3390/v12090911), 2020-08-20

**Figure S2.** Significant correlations between parameter  $\gamma$  (carrying capacity of the logistic model) and aphid variables calculated: A) on periods relative to the planting date (i.e. from  $t_1$  to  $t_2$  days after planting); B) on periods relative to the date of epidemic peak (i.e. from  $t_1 = \mu - \Delta t_1$  to  $t_2 = \mu - \Delta t_1 + \Delta t_2$ ). Horizontal bars represent the periods over which aphid abundances are aggregated. RIS-181: *Aphis gossypii*; RIS-322: *Myzus persicae*; RIS-410: *Macrosiphum euphorbiae*; total: total aphid population. Correlations are ranked according to the mean square error (MSE) of the corresponding models.

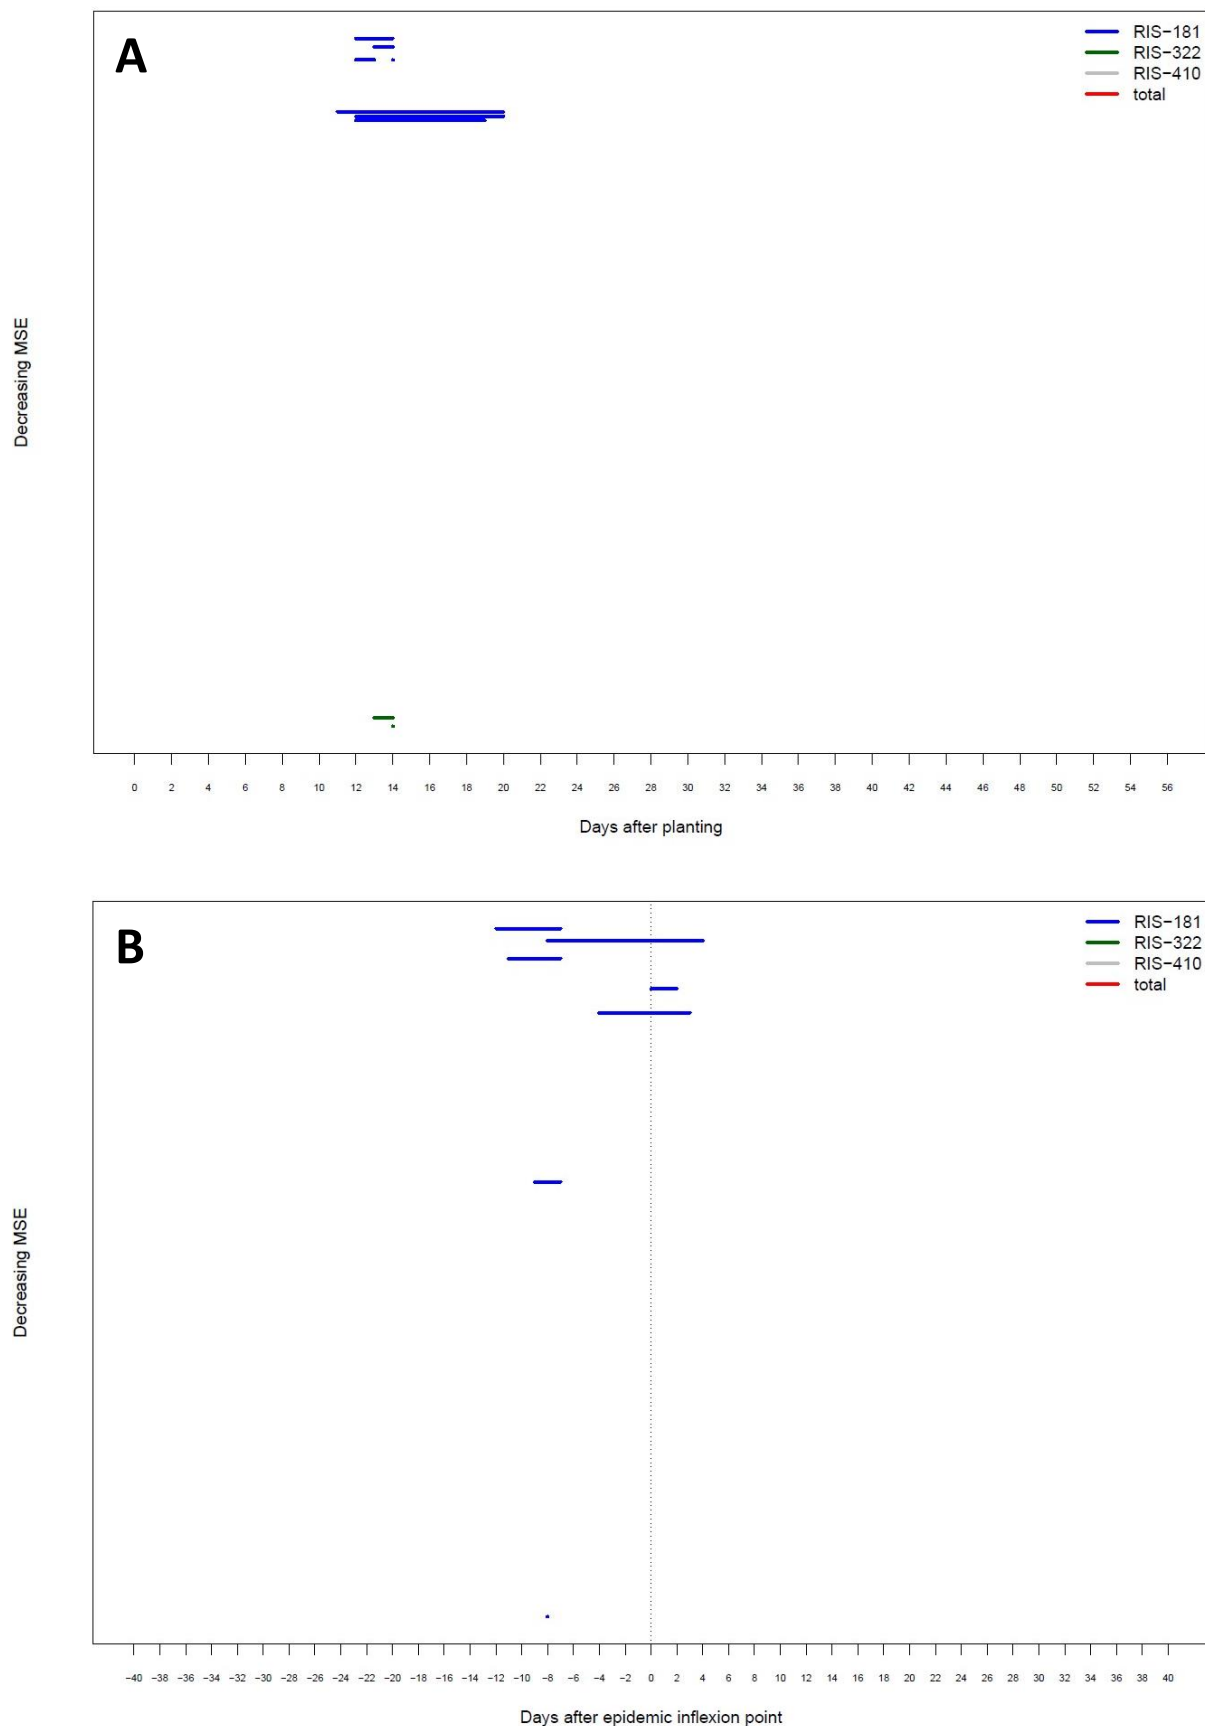

Supplement: s1 [file s1]
