# Supplementary material for: Can Winged Aphid Abundance Be a Predictor of Cucurbit Aphid-Borne Yellows Virus Epidemics in Melon Crop?
Source: MDPI journal article supplement (doi:10.3390/v12090911), 2020-08-20
Supplement: s1 [file s1]

**Table S1.** Significant correlations (with a maximal type-1 error of 1%) between virus variables and aphid variables computed on periods relative to the planting date. Significant correlations involve abundances of *Aphis gossypii* (RIS-181), *Myzus persicae* (RIS-322) and total aphid population (total) aggregated between  $t_1$  and  $t_2$  (in days from planting date). The relationship between the virus variable and the aphid variable was modelled with a linear model ( $z_k = A_0 + A_1 \cdot x_k$ ) for the area under the disease progress curve (AUDPC<sub>56</sub>) and an exponential model ( $z_k = B_0 + B_1(1 - e^{-B_2 \cdot x_k})$ ) for the parameters of the logistic equation ( $\mu$  and  $\gamma$ ). For AUDPC<sub>56</sub>, only the 15 correlations having the lowest mean square errors are presented (total of 413).

| Virus variable<br>(dependent) | Aphid variable<br>(explanatory) |       |       | Spearman<br>correlation<br>coefficient |       |       |       |       |       | Mean<br>square<br>error |
|-------------------------------|---------------------------------|-------|-------|----------------------------------------|-------|-------|-------|-------|-------|-------------------------|
|                               |                                 | $t_1$ | $t_2$ |                                        | $A_0$ | $A_1$ | $B_0$ | $B_1$ | $B_2$ |                         |
| AUDPC <sub>56</sub>           | RIS-181                         | 11    | 17    | 0.779                                  | 935.3 | 22.3  | na    | na    | na    | 374278                  |
| AUDPC <sub>56</sub>           | total                           | 4     | 34    | 0.873                                  | 794.4 | 0.9   | na    | na    | na    | 381970                  |
| AUDPC <sub>56</sub>           | total                           | 6     | 34    | 0.873                                  | 795.8 | 0.9   | na    | na    | na    | 382619                  |
| AUDPC <sub>56</sub>           | total                           | 7     | 34    | 0.855                                  | 788.6 | 1.0   | na    | na    | na    | 383680                  |
| AUDPC <sub>56</sub>           | total                           | 5     | 34    | 0.873                                  | 808.0 | 0.9   | na    | na    | na    | 384915                  |
| AUDPC <sub>56</sub>           | total                           | 8     | 34    | 0.873                                  | 790.8 | 1.0   | na    | na    | na    | 386144                  |
| AUDPC <sub>56</sub>           | RIS-181                         | 10    | 19    | 0.815                                  | 985.2 | 16.5  | na    | na    | na    | 387200                  |
| AUDPC <sub>56</sub>           | total                           | 9     | 34    | 0.873                                  | 803.6 | 1.0   | na    | na    | na    | 391689                  |
| AUDPC <sub>56</sub>           | total                           | 3     | 34    | 0.855                                  | 806.8 | 0.9   | na    | na    | na    | 393733                  |
| AUDPC <sub>56</sub>           | RIS-181                         | 10    | 17    | 0.761                                  | 997.7 | 18.7  | na    | na    | na    | 393753                  |
| AUDPC <sub>56</sub>           | total                           | 1     | 34    | 0.855                                  | 854.3 | 0.8   | na    | na    | na    | 402753                  |
| AUDPC <sub>56</sub>           | total                           | 2     | 34    | 0.836                                  | 845.6 | 0.8   | na    | na    | na    | 404972                  |
| AUDPC <sub>56</sub>           | total                           | 4     | 35    | 0.845                                  | 800.9 | 0.9   | na    | na    | na    | 405497                  |
| AUDPC <sub>56</sub>           | total                           | 10    | 34    | 0.845                                  | 831.1 | 1.0   | na    | na    | na    | 405838                  |
| AUDPC <sub>56</sub>           | total                           | 4     | 33    | 0.855                                  | 834.8 | 0.9   | na    | na    | na    | 406846                  |
| $\mu$                         | RIS-181                         | 1     | 10    | -0.797                                 | na    | na    | 49.9  | -27.2 | 0.100 | 8.5                     |
| $\mu$                         | RIS-181                         | 2     | 10    | -0.797                                 | na    | na    | 49.0  | -26.1 | 0.106 | 9.3                     |
| $\mu$                         | RIS-181                         | 5     | 10    | -0.761                                 | na    | na    | 50.1  | -27.0 | 0.147 | 9.5                     |
| $\mu$                         | RIS-181                         | 4     | 10    | -0.788                                 | na    | na    | 49.8  | -26.5 | 0.142 | 9.5                     |
| $\mu$                         | RIS-181                         | 3     | 10    | -0.799                                 | na    | na    | 49.6  | -26.5 | 0.119 | 10.2                    |
| $\mu$                         | total                           | 2     | 2     | -0.802                                 | na    | na    | 49.9  | -26.1 | 0.262 | 12.0                    |
| $\mu$                         | RIS-181                         | 1     | 9     | -0.756                                 | na    | na    | 48.9  | -25.6 | 0.139 | 13.0                    |
| $\mu$                         | RIS-181                         | 2     | 8     | -0.738                                 | na    | na    | 46.7  | -24.1 | 0.165 | 13.4                    |
| $\mu$                         | RIS-181                         | 2     | 9     | -0.764                                 | na    | na    | 48.1  | -24.6 | 0.157 | 13.6                    |
| $\mu$                         | RIS-181                         | 4     | 9     | -0.735                                 | na    | na    | 49.8  | -25.9 | 0.268 | 13.7                    |
| $\mu$                         | total                           | 1     | 9     | -0.747                                 | na    | na    | 54.7  | -30.7 | 0.016 | 13.9                    |
| $\mu$                         | RIS-181                         | 4     | 11    | -0.738                                 | na    | na    | 51.4  | -28.4 | 0.101 | 14.5                    |
| $\mu$                         | RIS-181                         | 6     | 8     | -0.789                                 | na    | na    | 42.4  | -20.1 | 0.276 | 15.7                    |
| $\mu$                         | total                           | 6     | 6     | -0.763                                 | na    | na    | 41.2  | -21.4 | 0.036 | 29.7                    |
| $\gamma$                      | RIS-181                         | 12    | 14    | 0.753                                  | na    | na    | 0     | 1     | 0.170 | 0.008                   |
| $\gamma$                      | RIS-181                         | 13    | 14    | 0.811                                  | na    | na    | 0     | 1     | 0.231 | 0.010                   |
| $\gamma$                      | RIS-181                         | 12    | 13    | 0.737                                  | na    | na    | 0     | 1     | 0.266 | 0.013                   |
| $\gamma$                      | RIS-181                         | 14    | 14    | 0.735                                  | na    | na    | 0     | 1     | 0.530 | 0.013                   |
| $\gamma$                      | RIS-181                         | 11    | 19    | 0.746                                  | na    | na    | 0     | 1     | 0.053 | 0.025                   |
| $\gamma$                      | RIS-181                         | 11    | 20    | 0.746                                  | na    | na    | 0     | 1     | 0.050 | 0.025                   |
| $\gamma$                      | RIS-181                         | 12    | 20    | 0.758                                  | na    | na    | 0     | 1     | 0.056 | 0.026                   |
| $\gamma$                      | RIS-181                         | 12    | 19    | 0.735                                  | na    | na    | 0     | 1     | 0.060 | 0.027                   |
| $\gamma$                      | RIS-322                         | 13    | 14    | 0.766                                  | na    | na    | 0     | 1     | 1.557 | 0.165                   |
| $\gamma$                      | RIS-322                         | 14    | 14    | 0.810                                  | na    | na    | 0     | 1     | 1.916 | 0.167                   |
