# Supplementary figures and images for: Can Winged Aphid Abundance Be a Predictor of Cucurbit Aphid-Borne Yellows Virus Epidemics in Melon Crop?
Source: MDPI journal article supplement (doi:10.3390/v12090911), 2020-08-20

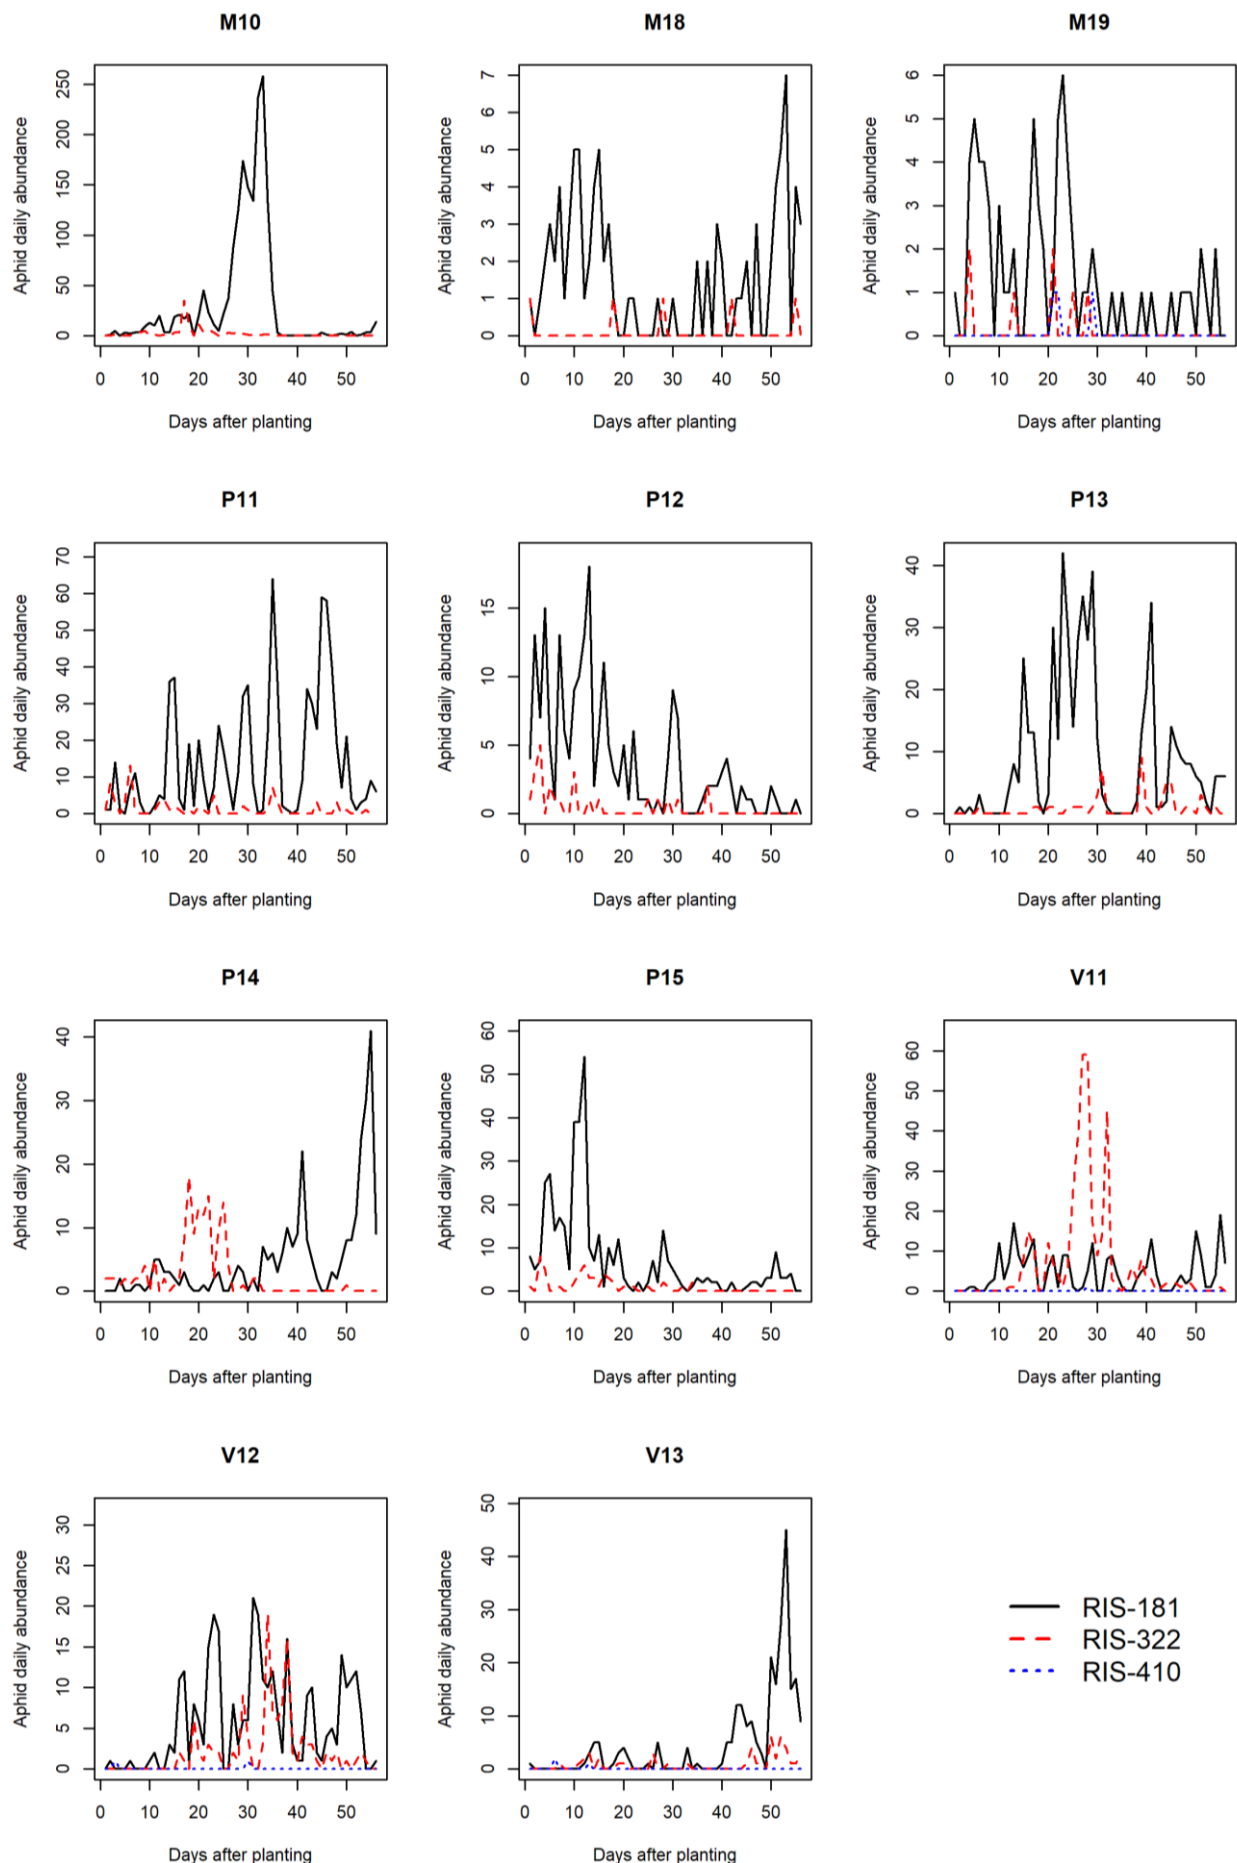

Supplement: s1 [file s1]
